# Supplementary material
Source: PubMed Central journal article supplement (PMC7446978)

**SUPPLEMENTARY TABLES:**

**Supplementary Table I.** January vs February 2020 stroke code patient comparison, selected variables

|                                         | <b>January<br/>(N=181)</b> | <b>February<br/>(N=167)</b> | <b>P-value</b> |
|-----------------------------------------|----------------------------|-----------------------------|----------------|
| ED Stroke Code Location                 | 156 (86.7)                 | 140 (83.8)                  | 0.4562         |
| EMS                                     | 103 (57.2)                 | 102 (61.1)                  | 0.4540         |
| Stroke type                             |                            |                             | 0.4383         |
| ICH                                     | 13 (7.2)                   | 9 (5.4)                     |                |
| Ischemic stroke                         | 69 (38.1)                  | 65 (38.9)                   |                |
| TIA                                     | 9 (5.0)                    | 11 (6.6)                    |                |
| SAH                                     | 0 (0.0)                    | 3 (1.8)                     |                |
| Non-stroke                              | 90 (49.7)                  | 79 (47.3)                   |                |
| Age, median (IQR)                       | 68.0 (56.0, 81.0)          | 71 (61, 81.0)               | 0.1060         |
| Female sex                              | 101 (56.4)                 | 93 (55.7)                   | 0.8904         |
| Race/ethnicity                          |                            |                             | 0.7362         |
| White                                   | 127 (71.4)                 | 122 (73.1)                  |                |
| Black                                   | 36 (20.2)                  | 28 (16.8)                   |                |
| Hispanic                                | 9 (5.1)                    | 12 (7.2)                    |                |
| Other                                   | 6 (3.4)                    | 5 (3.0)                     |                |
| New Haven residence                     | 29 (16.0)                  | 23 (13.8)                   | 0.5565         |
| Pre admission mRS 0-2                   | 129 (86.0)                 | 98 (88.3)                   | 0.5871         |
| NIHSS on admission, median (IQR)        | 3 (1-11)                   | 4 (1-10)                    | 0.5776         |
| AP use before admission                 | 74 (40.9)                  | 69 (41.6)                   | 0.8974         |
| AC use before admission                 | 29 (16.0)                  | 33 (19.9)                   | 0.3488         |
| LSW to ED arrival time                  | 259.0 (104.5-698.5)        | 217.0 (75.0, 732.0)         | 0.2809         |
| tPA                                     | 12 (6.6)                   | 9 (5.4)                     | 0.6273         |
| Door-to-needle                          | 66.5 (50.5, 111.5)         | 57.0 (44.0, 75.0)           | 0.3554         |
| thrombectomy                            | 19 (10.5)                  | 16 (9.6)                    | 0.7764         |
| TICI 2B +                               | 16 (8.8)                   | 8 (4.8)                     | 0.1364         |
| Door-to-revascularization, median (IQR) | 104 (75.5, 150.0)          | 131.5 (81.0, 179.0)         | 0.3703         |

Data displayed as n(%) unless otherwise specified

ED = emergency department; EMS = emergency medical services; ICH = intracerebral hemorrhage; TIA = transient ischemic attack; SAH = subarachnoid hemorrhage; mRS = modified Rankin Scale; NIHSS = National Institutes of Health Stroke Scale; AP = antiplatelet; AC = anticoagulation; LSW = last seen well; tPA = recombinant tissue plasminogen activator; TICI = thrombolysis in cerebral infarction

**Supplementary Table II.** Linear regression models for aggregate outcome measures.

| <b>Outcome Measure</b>                                        | <b>Year</b>               | <b>Y-intercept</b> | <b>Slope</b> | <b>P-value</b>    | <b>R-squared</b> |
|---------------------------------------------------------------|---------------------------|--------------------|--------------|-------------------|------------------|
| Stroke Codes Called                                           | 2020*                     | 70.81              | -2.50        | <b>&lt;0.0001</b> | 0.7163           |
|                                                               | Week 1 through 7, 2020*   | 68.14              | -2.04        | 0.2217            | 0.2803           |
|                                                               | Week 8 through 11, 2020*  | 171.60             | -12.80       | <b>0.0296</b>     | 0.9416           |
|                                                               | Week 12 through 17, 2020* | 40.30              | -0.46        | 0.1168            | 0.4987           |
|                                                               | 2019                      | 43.08              | 0.35         | 0.2973            | 0.0721           |
|                                                               | 2020                      | 67.88              | -2.60        | <b>&lt;0.0001</b> | 0.7085           |
| ED Stroke Codes                                               | 2019                      | 37.65              | 0.02         | 0.9437            | 0.0003           |
|                                                               | 2020                      | 55.09              | -2.07        | <b>&lt;0.0001</b> | 0.7000           |
| Inpatient Stroke Codes                                        | 2019                      | 5.72               | 0.28         | 0.0607            | 0.2054           |
|                                                               | 2020                      | 12.79              | -0.53        | <b>0.0002</b>     | 0.6139           |
| Telestroke Consultations**                                    | 2019                      | 12.40              | 0.25         | 0.4091            | 0.0459           |
|                                                               | 2020                      | 18.29              | -0.24        | 0.4355            | 0.0410           |
| Intravenous alteplase administered                            | 2019                      | 1.64               | 0.07         | 0.2320            | 0.0937           |
|                                                               | 2020                      | 3.63               | -0.13        | 0.1107            | 0.1608           |
| Mechanical thrombectomies                                     | 2019                      | 1.42               | 0.19         | 0.0963            | 0.1735           |
|                                                               | 2020                      | 3.66               | 0.02         | 0.7701            | 0.0059           |
| % Stroke Codes Receiving alteplase or mechanical thrombectomy | 2019                      | 7.75               | 0.41         | 0.1012            | 0.1689           |
|                                                               | 2020                      | 10.44              | 0.41         | 0.1564            | 0.1381           |

\* YNHH, GH, LMH

\*\* YNHH

*The remainder of models were constructed using data from YNHH and GH*

Abbreviations: YNHH, Yale-New Haven Hospital; GH, Greenwich Hospital; LMH, Lawrence and Memorial Hospital, ED, emergency department

**Supplementary Table III.** Observed and Expected Stroke Codes After Week 6 in 2020 at YNHH

| <b>Calendar Week in 2020</b> | <b>Observed Number of Stroke Codes</b> | <b>Observed/Expected* Stroke Codes (%)</b> |
|------------------------------|----------------------------------------|--------------------------------------------|
| 8                            | 54                                     | 101.9                                      |
| 9                            | 54                                     | 101.9                                      |
| 10                           | 46                                     | 86.8                                       |
| 11                           | 21                                     | 39.6                                       |
| 12                           | 28                                     | 52.8                                       |
| 13                           | 27                                     | 50.9                                       |
| 14                           | 24                                     | 45.3                                       |
| 15                           | 25                                     | 47.2                                       |
| 16                           | 27                                     | 50.9                                       |
| 17                           | 27                                     | 50.9                                       |

\* Expected number of stroke codes called = Median number of stroke code called from Week 1 through 7 in 2020 at YNHH (53 stroke codes called per week)

Abbreviations: YNHH, Yale-New Haven Hospital

**Supplementary Figure I.** Trends in stroke code activation by hospital, January-April 28, 2020. Arrowheads indicate weeks at which downtrends were visualized.

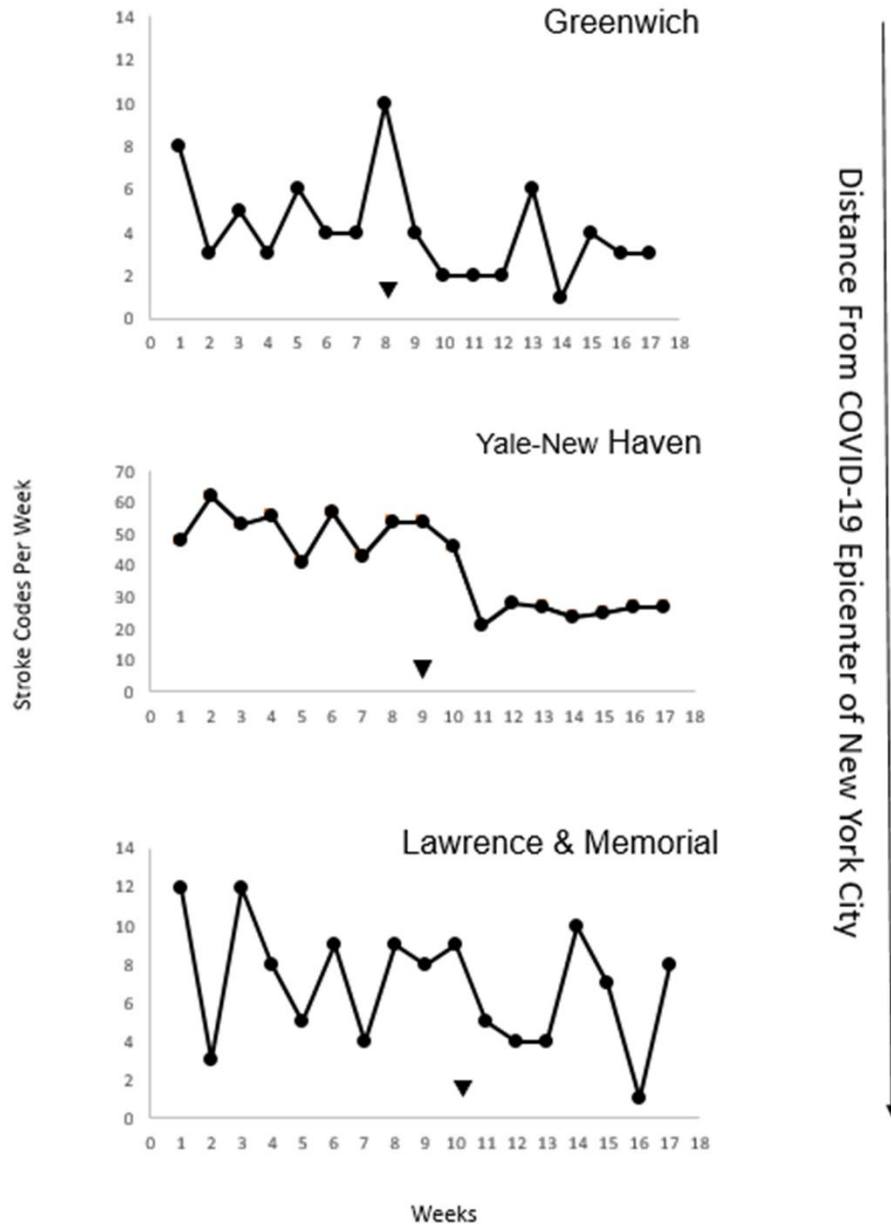

Supplement: str-51-10.1161.str.0000000000000347-s001.pdf [file str-51-10.1161.str.0000000000000347-s001.pdf]
