# Supplementary material
Source: PubMed Central journal article supplement (PMC7446978)
Supplement: str-51-10.1161.str.0000000000000347-s003.pdf [file str-51-10.1161.str.0000000000000347-s003.pdf]

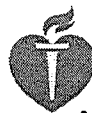

## Acknowledgment Permission Form

---

**Journal** Stroke

**Manuscript Number** 030683DR1

**First Author** Adam Jasne

**Title of Work** Stroke Code Presentations, Interventions, and Outcomes Before and During the COVID-19 Pandemic

Authors must provide written permission/approval from all individuals mentioned by name in the Acknowledgments section of a submitted manuscript. By signing this form, any and all acknowledged persons therefore state that they have read and approved the mention of their names in the Acknowledgment section of the aforementioned paper.

|           |                        |           |                           |      |                 |
|-----------|------------------------|-----------|---------------------------|------|-----------------|
| Name (1)  | <u>Sheryl Feldheim</u> | Signature | <u></u>                   | Date | <u></u>         |
| Name (2)  | <u>Lisa Bedard</u>     | Signature | <u><i>Lisa Bedard</i></u> | Date | <u>5/5/2020</u> |
| Name (3)  | <u></u>                | Signature | <u></u>                   | Date | <u></u>         |
| Name (4)  | <u></u>                | Signature | <u></u>                   | Date | <u></u>         |
| Name (5)  | <u></u>                | Signature | <u></u>                   | Date | <u></u>         |
| Name (6)  | <u></u>                | Signature | <u></u>                   | Date | <u></u>         |
| Name (7)  | <u></u>                | Signature | <u></u>                   | Date | <u></u>         |
| Name (8)  | <u></u>                | Signature | <u></u>                   | Date | <u></u>         |
| Name (9)  | <u></u>                | Signature | <u></u>                   | Date | <u></u>         |
| Name (10) | <u></u>                | Signature | <u></u>                   | Date | <u></u>         |
| Name (11) | <u></u>                | Signature | <u></u>                   | Date | <u></u>         |
| Name (12) | <u></u>                | Signature | <u></u>                   | Date | <u></u>         |
| Name (13) | <u></u>                | Signature | <u></u>                   | Date | <u></u>         |
| Name (14) | <u></u>                | Signature | <u></u>                   | Date | <u></u>         |
| Name (15) | <u></u>                | Signature | <u></u>                   | Date | <u></u>         |
| Name (16) | <u></u>                | Signature | <u></u>                   | Date | <u></u>         |
| Name (17) | <u></u>                | Signature | <u></u>                   | Date | <u></u>         |
| Name (18) | <u></u>                | Signature | <u></u>                   | Date | <u></u>         |
| Name (19) | <u></u>                | Signature | <u></u>                   | Date | <u></u>         |
| Name (20) | <u></u>                | Signature | <u></u>                   | Date | <u></u>         |
