# Supplementary material
Source: PubMed Central journal article supplement (PMC7446978)
Supplement: str-51-10.1161.str.0000000000000347-s006.pdf [file str-51-10.1161.str.0000000000000347-s006.pdf]

## Change of Authorship Form

---

(Must be completed and signed by ALL authors)

Please check all that apply

New author(s) have been added (in addition to this form, all new authors must complete the copyright transfer agreement and conflict of interest disclosure.

Change in order of authorship.

An author wishes to remove his/her name. An author's name may only be removed his/her own request and a letter signed by the author should accompany this form

Manuscript Number 030683DR1

Manuscript Title Stroke Code Presentations, Interventions, and Outcomes Before and During the COVID-19 Pandemic

### Former Authorship

Please list ALL AUTHORS in the same order as the original submission. For more than 12, use an extra sheet.

#### Print Name

Name (1) Adam S. Jasne, MD  
Name (2) Pola Chojecka, MD  
Name (3) Ilavarasy Maran, MD  
Name (4) Razaz Mageid, MD  
Name (5) Mohamed Eldokmak, MD  
Name (6) Qiang Zhang, BA

#### Print Name

Name (7) Karin Nystrom, MSN  
Name (8) Kelsey Vlieks, MBA  
Name (9) Nils Petersen, MD, PhD, Msc  
Name (10) Guido J.Falcone, MD,ScD,MPH  
Name (11) Charles Wira, MD  
Name (12) Paul Lleva, MD

### New Authorship

All authors must sign below agreeing to the changes in authorship. The authorship order must reflect the authorship order of the manuscript.

|                                               |                                                                                                |                       |
|-----------------------------------------------|------------------------------------------------------------------------------------------------|-----------------------|
| Name (1) <u>Adam S. Jasne, MD</u>             | Signature _____                                                                                | Date _____            |
| Name (2) <u>Pola Chojecka, MD</u>             | Signature _____                                                                                | Date _____            |
| Name (3) <u>Ilavarasy Maran, MD</u>           | Signature _____                                                                                | Date _____            |
| Name (4) <u>Razaz Mageid, MD</u>              | Signature _____                                                                                | Date _____            |
| Name (5) <u>Mohamed Eldokmak, MD</u>          | Signature _____                                                                                | Date _____            |
| Name (6) <u>Qiang Zhang, BA</u>               | Signature _____                                                                                | Date _____            |
| Name (7) <u>Karin Nystrom, MSN</u>            | Signature _____                                                                                | Date _____            |
| Name (8) <u>Kelsey Vlieks, MBA</u>            | Signature _____                                                                                | Date _____            |
| Name (9) <u>Michael Askenase, PhD</u>         | Signature _____                                                                                | Date _____            |
| Name (10) <u>Nils Petersen, MD, 1 PhD,Msc</u> | Signature 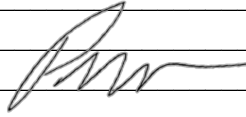 | Date <u>6/16/2020</u> |
| Name (11) <u>Guido J.Falcone, MD,ScD,MPH</u>  | Signature _____                                                                                | Date _____            |
| Name (12) <u>Charles Wira, MD</u>             | Signature _____                                                                                | Date _____            |

Please scan and email to [stroke@strokeahajournal.org](mailto:stroke@strokeahajournal.org).

**Manuscript number:** 030683DR1

**Manuscript title:** Stroke Code Presentations, Interventions, and Outcomes Before and During the COVID-19 Pandemic

**Former authorship, continued:**

Neer Zeevi, MD,  
Reshma Narula, MD  
Hardik Amin, MD,  
Dhasakumar Navaratnam, MD,PhD,  
Caitlin Loomis, MD,  
David Y. Hwang, MD,  
Joseph Schindler, MD,  
Charles Matouk, MD,  
Harlan Krumholz, MD,  
Serena Spudich, MD, MA,  
Kevin N. Sheth, MD,  
Lauren H. Sansing, MD, MS,  
Richa Sharma, MD,MPH

**New authorship, continued:**

Author

Signature

Date

Paul Lleva, MD

Neer Zeevi, MD

Reshma Narula, MD

Hardik Amin, MD

Dhasakumar Navaratnam, MD,PhD

Caitlin Loomis, MD

David Y. Hwang, MD

Joseph Schindler, MD

Ryan Hebert, MD

Charles Matouk, MD

Harlan Krumholz, MD

Serena Spudich, MD, MA

Kevin N. Sheth, MD

Lauren H. Sansing, MD, MS

Richa Sharma, MD,MPH
